# Supplementary material
Source: PubMed Central journal article supplement (PMC6776704)
Supplement: NIHMS1519943-supplement-2.pdf [file NIHMS1519943-supplement-2.pdf]

Supplemental Table 2. The association of previously reported variants in the present study

| rs#               | chr | position | alleles | EAF    | meta (N=11,569) |             |                    |
|-------------------|-----|----------|---------|--------|-----------------|-------------|--------------------|
|                   |     |          |         |        | $\beta$         | p           | R <sup>2</sup> (%) |
| <i>rs10783050</i> | 1   | 97037083 | C/T     | 0.6246 | 0.01            | 0.54        | 15.4               |
| <i>rs11165643</i> | 1   | 96924097 | C/T     | 0.5876 | -0.03           | <b>0.03</b> | 9.7                |
| <i>rs10747472</i> | 1   | 96276198 | G/C     | 0.6781 | 0.00            | 0.87        | 0.0                |
| <i>rs3002271</i>  | 1   | 97442229 | C/A     | 0.5814 | 0.01            | 0.36        | 0.0                |
| <i>rs587242</i>   | 1   | 96886267 | G/A     | 0.2714 | -0.03           | 0.09        | 0.0                |
| <i>rs1555543</i>  | 1   | 96944797 | C/A     | 0.4113 | 0.04            | <b>0.01</b> | 0.0                |
| <i>rs1973993</i>  | 1   | 96943994 | C/T     | 0.4156 | 0.04            | <b>0.01</b> | 0.0                |

Notes: The first and second alleles represented the effect and alternative alleles. EAF was the effect allele frequency.  $\beta$  was the regression coefficient of normalized phenotypic residual on the effect allele.
