# Supplementary material
Source: PubMed Central journal article supplement (PMC6776704)
Supplement: NIHMS1519943-supplement-3.pdf [file NIHMS1519943-supplement-3.pdf]

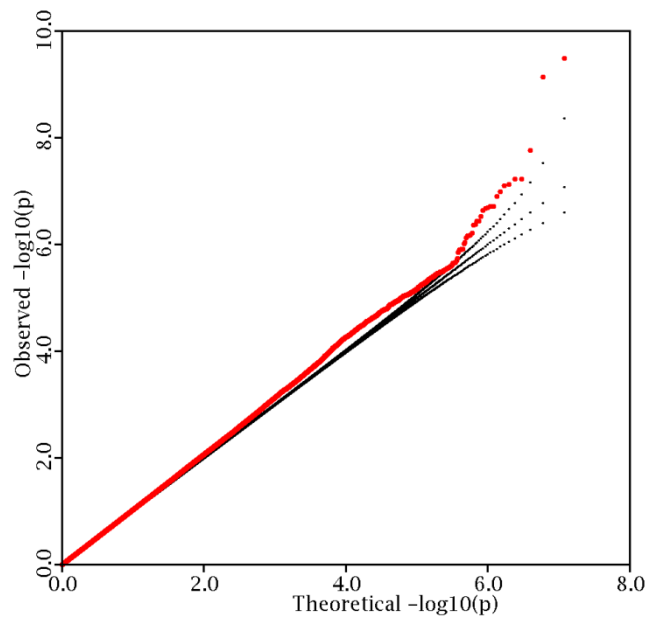

**Supplemental Figure 1. Logarithmic quantile-quantile (QQ) plot of the meta-analysis p values.**

Ten-based negative logarithm of observed p-value was plotted (red line) against that of theoretical p-value under the null hypothesis of no association. Black dashed lines represent the 95% confidence interval. It was clear that a marked deviation appeared in the tail of the distribution, suggesting the possible existence of true association.
