# Supplementary material
Source: PubMed Central journal article supplement (PMC6776704)
Supplement: NIHMS1519943-supplement-4.pdf [file NIHMS1519943-supplement-4.pdf]

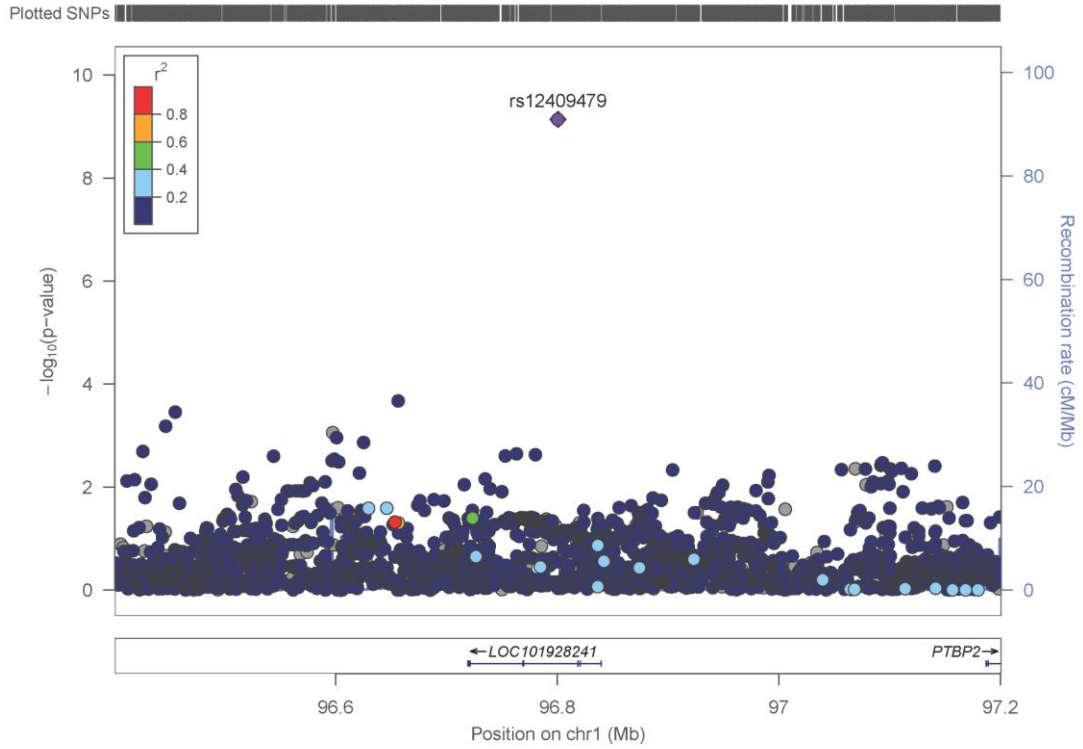

**Supplemental Figure 2. Regional plot of *rs12409479*.**

The vertical axis represents 10-based negative logarithm of meta-analysis p-value, against the horizontal axis of genomic position. The flanking 400 kb region to either direction from *rs12409479* is displayed.
